# Supplementary material for: Dysregulated Provision of Oxidisable Substrates to the Mitochondria in ME/CFS Lymphoblasts
Source: PubMed Central journal article supplement (PMC7921983; doi:10.3390/ijms22042046), 2021-02-19
Supplement: ijms-22-02046-s001.pdf [file ijms-22-02046-s001.pdf]

# Supplemental Information

## Pathway over-representation analysis of differentially expressed transcripts and proteins in ME/CFS lymphoblasts

**Table S1: Pathways overrepresented amongst downregulated transcripts in ME/CFS lymphoblasts.**

| Reactome pathway                                                                 | Number of genes      |                                    |          | Fold enrichment | Binomial test P-value  | False discovery rate (FDR) |
|----------------------------------------------------------------------------------|----------------------|------------------------------------|----------|-----------------|------------------------|----------------------------|
|                                                                                  | In entire experiment | In downregulated fraction (Q<0.05) | Expected |                 |                        |                            |
| Formation of a pool of free 40S subunits (R-HSA-72689)                           | 97                   | 63                                 | 9.92     | 6.35            | $5.54 \times 10^{-30}$ | $1.20 \times 10^{-26}$     |
| GTP hydrolysis and joining of the 60S ribosomal subunit (R-HSA-72706)            | 107                  | 65                                 | 10.94    | 5.94            | $2.68 \times 10^{-29}$ | $1.45 \times 10^{-26}$     |
| Cap-dependent Translation Initiation (R-HSA-72737)                               | 114                  | 67                                 | 11.66    | 5.75            | $2.35 \times 10^{-29}$ | $1.69 \times 10^{-26}$     |
| Eukaryotic Translation Initiation (R-HSA-72613)                                  | 114                  | 67                                 | 11.66    | 5.75            | $2.35 \times 10^{-29}$ | $2.54 \times 10^{-26}$     |
| L13a-mediated translational silencing of Ceruloplasmin expression (R-HSA-156827) | 106                  | 64                                 | 10.84    | 5.9             | $1.01 \times 10^{-28}$ | $3.63 \times 10^{-26}$     |
| Viral mRNA Translation (R-HSA-192823)                                            | 85                   | 58                                 | 8.69     | 6.67            | $9.12 \times 10^{-29}$ | $3.94 \times 10^{-26}$     |

|                                                                                             |     |     |       |      |                        |                        |
|---------------------------------------------------------------------------------------------|-----|-----|-------|------|------------------------|------------------------|
| Translation (R-HSA-72766)                                                                   | 286 | 105 | 29.24 | 3.59 | $1.94 \times 10^{-28}$ | $5.98 \times 10^{-26}$ |
| Peptide chain elongation (R-HSA-156902)                                                     | 85  | 57  | 8.69  | 6.56 | $6.35 \times 10^{-28}$ | $1.71 \times 10^{-25}$ |
| Selenocysteine synthesis (R-HSA-2408557)                                                    | 89  | 58  | 9.1   | 6.37 | $8.94 \times 10^{-28}$ | $1.93 \times 10^{-25}$ |
| Eukaryotic Translation Elongation (R-HSA-156842)                                            | 89  | 58  | 9.1   | 6.37 | $8.94 \times 10^{-28}$ | $2.14 \times 10^{-25}$ |
| Regulation of expression of SLITs and ROBOs (R-HSA-9010553)                                 | 155 | 75  | 15.85 | 4.73 | $1.57 \times 10^{-27}$ | $3.08 \times 10^{-25}$ |
| Eukaryotic Translation Termination (R-HSA-72764)                                            | 89  | 57  | 9.1   | 6.26 | $5.95 \times 10^{-27}$ | $1.07 \times 10^{-24}$ |
| Nonsense Mediated Decay (NMD) independent of the Exon Junction Complex (EJC) (R-HSA-975956) | 91  | 57  | 9.31  | 6.13 | $1.74 \times 10^{-26}$ | $2.89 \times 10^{-24}$ |
| Nonsense Mediated Decay (NMD) enhanced by the Exon Junction Complex (EJC) (R-               | 111 | 62  | 11.35 | 5.46 | $4.10 \times 10^{-26}$ | $5.89 \times 10^{-24}$ |

|                                                                             |     |     |       |      |                        |                        |
|-----------------------------------------------------------------------------|-----|-----|-------|------|------------------------|------------------------|
| HSA-975957)                                                                 |     |     |       |      |                        |                        |
| Nonsense-Mediated Decay (NMD) (R-HSA-927802)                                | 111 | 62  | 11.35 | 5.46 | $4.10 \times 10^{-26}$ | $6.31 \times 10^{-24}$ |
| Response of EIF2AK4 (GCN2) to amino acid deficiency (R-HSA-9633012)         | 97  | 58  | 9.92  | 5.85 | $6.10 \times 10^{-26}$ | $8.22 \times 10^{-24}$ |
| SRP-dependent cotranslational protein targeting to membrane (R-HSA-1799339) | 108 | 60  | 11.04 | 5.43 | $3.39 \times 10^{-25}$ | $4.31 \times 10^{-23}$ |
| Selenoamino acid metabolism (R-HSA-2408522)                                 | 106 | 59  | 10.84 | 5.44 | $7.75 \times 10^{-25}$ | $9.29 \times 10^{-23}$ |
| Metabolism of RNA (R-HSA-8953854)                                           | 635 | 159 | 64.93 | 2.45 | $1.11 \times 10^{-24}$ | $1.26 \times 10^{-22}$ |
| rRNA processing (R-HSA-72312)                                               | 194 | 79  | 19.84 | 3.98 | $2.67 \times 10^{-24}$ | $2.88 \times 10^{-22}$ |
| Influenza Viral RNA Transcription and Replication (R-HSA-168273)            | 127 | 63  | 12.99 | 4.85 | $7.32 \times 10^{-24}$ | $7.52 \times 10^{-22}$ |
| rRNA processing in the nucleus and cytosol (R-HSA-8868773)                  | 185 | 76  | 18.92 | 4.02 | $1.22 \times 10^{-23}$ | $1.19 \times 10^{-21}$ |
| Major pathway of rRNA                                                       | 175 | 73  | 17.89 | 4.08 | $3.99 \times 10^{-23}$ | $3.74 \times 10^{-21}$ |

|                                                                                   |     |     |       |      |                        |                        |
|-----------------------------------------------------------------------------------|-----|-----|-------|------|------------------------|------------------------|
| processing in the nucleolus and cytosol (R-HSA-6791226)                           |     |     |       |      |                        |                        |
| Signaling by ROBO receptors (R-HSA-376176)                                        | 191 | 76  | 19.53 | 3.89 | $7.74 \times 10^{-23}$ | $6.96 \times 10^{-21}$ |
| Influenza Life Cycle (R-HSA-168255)                                               | 136 | 63  | 13.91 | 4.53 | $2.30 \times 10^{-22}$ | $1.99 \times 10^{-20}$ |
| Influenza Infection (R-HSA-168254)                                                | 146 | 64  | 14.93 | 4.29 | $1.71 \times 10^{-21}$ | $1.42 \times 10^{-19}$ |
| Metabolism of amino acids and derivatives (R-HSA-71291)                           | 278 | 89  | 28.43 | 3.13 | $2.06 \times 10^{-20}$ | $1.65 \times 10^{-18}$ |
| Infectious disease (R-HSA-5663205)                                                | 411 | 103 | 42.03 | 2.45 | $3.24 \times 10^{-16}$ | $2.50 \times 10^{-14}$ |
| Formation of the ternary complex, and subsequently, the 43S complex (R-HSA-72695) | 49  | 31  | 5.01  | 6.19 | $3.65 \times 10^{-15}$ | $2.71 \times 10^{-13}$ |
| Translation initiation complex formation (R-HSA-72649)                            | 55  | 31  | 5.62  | 5.51 | $7.34 \times 10^{-14}$ | $5.11 \times 10^{-12}$ |
| Ribosomal scanning and start codon recognition (R-HSA-72702)                      | 55  | 31  | 5.62  | 5.51 | $7.34 \times 10^{-14}$ | $5.28 \times 10^{-12}$ |
| Activation of the                                                                 | 56  | 31  | 5.73  | 5.41 | $1.17 \times 10^{-13}$ | $7.86 \times 10^{-12}$ |

|                                                                                                                                    |     |     |       |      |                        |                        |
|------------------------------------------------------------------------------------------------------------------------------------|-----|-----|-------|------|------------------------|------------------------|
| mRNA upon binding of the cap-binding complex and eIFs, and subsequent binding to 43S (R-HSA-72662)                                 |     |     |       |      |                        |                        |
| Cellular responses to external stimuli (R-HSA-8953897)                                                                             | 486 | 106 | 49.7  | 2.13 | $7.00 \times 10^{-13}$ | $4.58 \times 10^{-11}$ |
| Cellular responses to stress (R-HSA-2262752)                                                                                       | 481 | 105 | 49.18 | 2.13 | $8.61 \times 10^{-13}$ | $5.46 \times 10^{-11}$ |
| Axon guidance (R-HSA-422475)                                                                                                       | 402 | 91  | 41.11 | 2.21 | $4.76 \times 10^{-12}$ | $2.93 \times 10^{-10}$ |
| Respiratory electron transport, ATP synthesis by chemiosmotic coupling, and heat production by uncoupling proteins. (R-HSA-163200) | 109 | 40  | 11.15 | 3.59 | $1.33 \times 10^{-11}$ | $7.95 \times 10^{-10}$ |
| Respiratory electron transport (R-HSA-611105)                                                                                      | 90  | 34  | 9.2   | 3.69 | $2.14 \times 10^{-10}$ | $1.25 \times 10^{-8}$  |
| The citric acid (TCA) cycle and respiratory electron                                                                               | 152 | 44  | 15.54 | 2.83 | $1.95 \times 10^{-9}$  | $1.11 \times 10^{-7}$  |

|                                                                                    |      |     |        |      |                       |                       |
|------------------------------------------------------------------------------------|------|-----|--------|------|-----------------------|-----------------------|
| transport (R-HSA-1428517)                                                          |      |     |        |      |                       |                       |
| Mitochondrial translation elongation (R-HSA-5389840)                               | 87   | 31  | 8.9    | 3.48 | $5.03 \times 10^{-9}$ | $2.78 \times 10^{-7}$ |
| Metabolism of proteins (R-HSA-392499)                                              | 1533 | 226 | 156.76 | 1.44 | $1.21 \times 10^{-8}$ | $6.54 \times 10^{-7}$ |
| Mitochondrial translation initiation (R-HSA-5368286)                               | 87   | 30  | 8.9    | 3.37 | $1.80 \times 10^{-8}$ | $9.27 \times 10^{-7}$ |
| Mitochondrial translation termination (R-HSA-5419276)                              | 87   | 30  | 8.9    | 3.37 | $1.80 \times 10^{-8}$ | $9.50 \times 10^{-7}$ |
| Mitochondrial translation (R-HSA-5368287)                                          | 93   | 31  | 9.51   | 3.26 | $2.23 \times 10^{-8}$ | $1.12 \times 10^{-6}$ |
| Metabolism (R-HSA-1430728)                                                         | 1513 | 221 | 154.71 | 1.43 | $3.80 \times 10^{-8}$ | $1.86 \times 10^{-6}$ |
| Complex I biogenesis (R-HSA-6799198)                                               | 49   | 21  | 5.01   | 4.19 | $7.59 \times 10^{-8}$ | $3.64 \times 10^{-6}$ |
| Developmental Biology (R-HSA-1266738)                                              | 616  | 105 | 62.99  | 1.67 | $3.82 \times 10^{-7}$ | $1.79 \times 10^{-5}$ |
| Disease (R-HSA-1643685)                                                            | 863  | 136 | 88.25  | 1.54 | $5.25 \times 10^{-7}$ | $2.41 \times 10^{-5}$ |
| Regulation of mRNA stability by proteins that bind AU-rich elements (R-HSA-450531) | 84   | 25  | 8.59   | 2.91 | $3.57 \times 10^{-6}$ | $1.60 \times 10^{-4}$ |

|                                                                                          |     |    |       |      |                       |                       |
|------------------------------------------------------------------------------------------|-----|----|-------|------|-----------------------|-----------------------|
| Protein localization (R-HSA-9609507)                                                     | 145 | 34 | 14.83 | 2.29 | $1.19 \times 10^{-5}$ | $5.23 \times 10^{-4}$ |
| Vif-mediated degradation of APOBEC3 G (R-HSA-180585)                                     | 51  | 17 | 5.21  | 3.26 | $3.16 \times 10^{-5}$ | 0.0014                |
| Negative regulation of NOTCH4 signaling (R-HSA-9604323)                                  | 52  | 17 | 5.32  | 3.2  | $4.00 \times 10^{-5}$ | 0.0017                |
| Metabolism of polyamines (R-HSA-351202)                                                  | 55  | 17 | 5.62  | 3.02 | $7.83 \times 10^{-5}$ | 0.0033                |
| mRNA Splicing (R-HSA-72172)                                                              | 183 | 37 | 18.71 | 1.98 | $1.07 \times 10^{-4}$ | 0.0042                |
| Autodegradation of Cdh1 by Cdh1:APC/C (R-HSA-174084)                                     | 62  | 18 | 6.34  | 2.84 | $1.06 \times 10^{-4}$ | 0.0042                |
| Oxygen-dependent proline hydroxylation of Hypoxia-inducible Factor Alpha (R-HSA-1234176) | 62  | 18 | 6.34  | 2.84 | $1.06 \times 10^{-4}$ | 0.0043                |
| FBXL7 down-regulates AURKA during mitotic entry and in early mitosis (R-                 | 52  | 16 | 5.32  | 3.01 | $1.32 \times 10^{-4}$ | 0.0050                |

|                                                                                    |     |    |       |      |                       |        |
|------------------------------------------------------------------------------------|-----|----|-------|------|-----------------------|--------|
| HSA-8854050)                                                                       |     |    |       |      |                       |        |
| HIV Infection (R-HSA-162906)                                                       | 213 | 41 | 21.78 | 1.88 | $1.31 \times 10^{-4}$ | 0.0051 |
| Regulation of activated PAK-2p34 by proteasome mediated degradation (R-HSA-211733) | 48  | 15 | 4.91  | 3.06 | $1.79 \times 10^{-4}$ | 0.0067 |
| APC/C:Cdc 20 mediated degradation of Securin (R-HSA-174154)                        | 65  | 18 | 6.65  | 2.71 | $1.88 \times 10^{-4}$ | 0.0069 |
| Degradation of DVL (R-HSA-4641258)                                                 | 54  | 16 | 5.52  | 2.9  | $2.00 \times 10^{-4}$ | 0.0071 |
| mRNA Splicing - Major Pathway (R-HSA-72163)                                        | 175 | 35 | 17.89 | 1.96 | $1.98 \times 10^{-4}$ | 0.0071 |
| Assembly of the pre-replicative complex (R-HSA-68867)                              | 66  | 18 | 6.75  | 2.67 | $2.25 \times 10^{-4}$ | 0.0077 |
| Regulation of ornithine decarboxylase (ODC) (R-HSA-350562)                         | 49  | 15 | 5.01  | 2.99 | $2.23 \times 10^{-4}$ | 0.0078 |
| Ubiquitin-dependent degradation of Cyclin D (R-HSA-75815)                          | 50  | 15 | 5.11  | 2.93 | $2.75 \times 10^{-4}$ | 0.0085 |
| Autodegradation of the E3 ubiquitin                                                | 50  | 15 | 5.11  | 2.93 | $2.75 \times 10^{-4}$ | 0.0086 |



|                                                                                                  |    |    |      |      |                       |        |
|--------------------------------------------------------------------------------------------------|----|----|------|------|-----------------------|--------|
| ligase<br>COP1 (R-<br>HSA-<br>349425)                                                            |    |    |      |      |                       |        |
| Vpu<br>mediated<br>degradation<br>of CD4 (R-<br>HSA-<br>180534)                                  | 50 | 15 | 5.11 | 2.93 | $2.75 \times 10^{-4}$ | 0.0087 |
| Regulation<br>of RAS by<br>GAPs (R-<br>HSA-<br>5658442)                                          | 61 | 17 | 6.24 | 2.73 | $2.60 \times 10^{-4}$ | 0.0088 |
| Ubiquitin<br>Mediated<br>Degradatio<br>n of<br>Phosphoryl<br>ated<br>Cdc25A<br>(R-HSA-<br>69601) | 50 | 15 | 5.11 | 2.93 | $2.75 \times 10^{-4}$ | 0.0089 |
| Degradatio<br>n of GLI2<br>by the<br>proteasome<br>(R-HSA-<br>5610783)                           | 56 | 16 | 5.73 | 2.79 | $2.98 \times 10^{-4}$ | 0.0089 |
| p53-<br>Independen<br>t DNA<br>Damage<br>Response<br>(R-HSA-<br>69610)                           | 50 | 15 | 5.11 | 2.93 | $2.75 \times 10^{-4}$ | 0.0090 |
| GLI3 is<br>processed<br>to GLI3R<br>by the<br>proteasome<br>(R-HSA-<br>5610785)                  | 56 | 16 | 5.73 | 2.79 | $2.98 \times 10^{-4}$ | 0.0090 |
| p53-<br>Independen<br>t G1/S<br>DNA<br>damage<br>checkpoint<br>(R-HSA-<br>69613)                 | 50 | 15 | 5.11 | 2.93 | $2.75 \times 10^{-4}$ | 0.0091 |
| Regulation<br>of RUNX2                                                                           | 62 | 17 | 6.34 | 2.68 | $3.12 \times 10^{-4}$ | 0.0092 |

|                                                                     |    |    |      |      |                       |        |
|---------------------------------------------------------------------|----|----|------|------|-----------------------|--------|
| expression and activity (R-HSA-8939902)                             |    |    |      |      |                       |        |
| Orc1 removal from chromatin (R-HSA-68949)                           | 68 | 18 | 6.95 | 2.59 | $3.19 \times 10^{-4}$ | 0.0093 |
| Regulation of Apoptosis (R-HSA-169911)                              | 51 | 15 | 5.21 | 2.88 | $3.37 \times 10^{-4}$ | 0.0097 |
| Degradation of GLI1 by the proteasome (R-HSA-5610780)               | 57 | 16 | 5.83 | 2.75 | $3.60 \times 10^{-4}$ | 0.010  |
| Cdc20:Phospho-APC/C mediated degradation of Cyclin A (R-HSA-174184) | 69 | 18 | 7.06 | 2.55 | $3.78 \times 10^{-4}$ | 0.010  |
| Cellular response to hypoxia (R-HSA-1234174)                        | 69 | 18 | 7.06 | 2.55 | $3.78 \times 10^{-4}$ | 0.010  |
| Switching of origins to a post-replicative state (R-HSA-69052)      | 87 | 21 | 8.9  | 2.36 | $3.58 \times 10^{-4}$ | 0.010  |
| Mitochondrial protein import (R-HSA-1268020)                        | 63 | 17 | 6.44 | 2.64 | $3.73 \times 10^{-4}$ | 0.010  |
| CDK-mediated phosphorylation and removal of Cdc6 (R-HSA-69017)      | 69 | 18 | 7.06 | 2.55 | $3.78 \times 10^{-4}$ | 0.010  |

|                                                                                                                         |    |    |      |      |                       |       |
|-------------------------------------------------------------------------------------------------------------------------|----|----|------|------|-----------------------|-------|
| AUF1 (hnRNP D0) binds and destabilizes mRNA (R-HSA-450408)                                                              | 52 | 15 | 5.32 | 2.82 | $4.11 \times 10^{-4}$ | 0.011 |
| APC:Cdc20 mediated degradation of cell cycle proteins prior to satisfaction of the cell cycle checkpoint (R-HSA-179419) | 70 | 18 | 7.16 | 2.51 | $4.46 \times 10^{-4}$ | 0.012 |
| APC/C:Cdh1 mediated degradation of Cdc20 and other APC/C:Cdh1 targeted proteins in late mitosis/early G1 (R-HSA-174178) | 70 | 18 | 7.16 | 2.51 | $4.46 \times 10^{-4}$ | 0.011 |
| Degradation of AXIN (R-HSA-4641257)                                                                                     | 53 | 15 | 5.42 | 2.77 | $4.98 \times 10^{-4}$ | 0.012 |
| Hh mutants that don't undergo autocatalytic processing are degraded by ERAD (R-HSA-5362768)                             | 53 | 15 | 5.42 | 2.77 | $4.98 \times 10^{-4}$ | 0.012 |
| SCF-beta-TrCP mediated degradation                                                                                      | 53 | 15 | 5.42 | 2.77 | $4.98 \times 10^{-4}$ | 0.013 |

|                                                                        |     |    |       |      |                       |       |
|------------------------------------------------------------------------|-----|----|-------|------|-----------------------|-------|
| of Emi1<br>(R-HSA-174113)                                              |     |    |       |      |                       |       |
| Regulation of RUNX3 expression and activity<br>(R-HSA-8941858)         | 53  | 15 | 5.42  | 2.77 | $4.98 \times 10^{-4}$ | 0.013 |
| Synthesis of DNA<br>(R-HSA-69239)                                      | 116 | 25 | 11.86 | 2.11 | $5.45 \times 10^{-4}$ | 0.013 |
| Processing of Capped Intron-Containing Pre-mRNA<br>(R-HSA-72203)       | 229 | 41 | 23.42 | 1.75 | $5.50 \times 10^{-4}$ | 0.013 |
| DNA Replication<br>(R-HSA-69306)                                       | 123 | 26 | 12.58 | 2.07 | $5.65 \times 10^{-4}$ | 0.013 |
| Hh mutants abrogate ligand secretion<br>(R-HSA-5387390)                | 54  | 15 | 5.52  | 2.72 | $6.01 \times 10^{-4}$ | 0.014 |
| Stabilization of p53<br>(R-HSA-69541)                                  | 54  | 15 | 5.52  | 2.72 | $6.01 \times 10^{-4}$ | 0.014 |
| Regulation of PTEN stability and activity<br>(R-HSA-8948751)           | 66  | 17 | 6.75  | 2.52 | $6.22 \times 10^{-4}$ | 0.014 |
| APC/C:Cdc20 mediated degradation of mitotic proteins<br>(R-HSA-176409) | 72  | 18 | 7.36  | 2.44 | $6.15 \times 10^{-4}$ | 0.014 |
| Degradation of beta-catenin by the destruction complex                 | 79  | 19 | 8.08  | 2.35 | $6.94 \times 10^{-4}$ | 0.015 |

|                                                                                              |    |    |      |      |                       |       |
|----------------------------------------------------------------------------------------------|----|----|------|------|-----------------------|-------|
| (R-HSA-195253)                                                                               |    |    |      |      |                       |       |
| ER-Phagosome pathway (R-HSA-1236974)                                                         | 79 | 19 | 8.08 | 2.35 | $6.94 \times 10^{-4}$ | 0.015 |
| Activation of APC/C and APC/C:Cdc 20 mediated degradation of mitotic proteins (R-HSA-176814) | 73 | 18 | 7.46 | 2.41 | $7.18 \times 10^{-4}$ | 0.016 |
| Cross-presentation of soluble exogenous antigens (endosomes) (R-HSA-1236978)                 | 44 | 13 | 4.5  | 2.89 | $7.82 \times 10^{-4}$ | 0.017 |
| NIK-->noncanonical NF-kB signaling (R-HSA-5676590)                                           | 57 | 15 | 5.83 | 2.57 | 0.0010                | 0.021 |
| The role of GTSE1 in G2/M progression after G2 checkpoint (R-HSA-8852276)                    | 69 | 17 | 7.06 | 2.41 | 0.0010                | 0.021 |
| Hedgehog ligand biogenesis (R-HSA-5358346)                                                   | 57 | 15 | 5.83 | 2.57 | 0.0010                | 0.021 |
| CDT1 association with the CDC6:ORC:origin complex (R-HSA-68827)                              | 57 | 15 | 5.83 | 2.57 | 0.0010                | 0.022 |

|                                                                               |    |    |      |      |        |       |
|-------------------------------------------------------------------------------|----|----|------|------|--------|-------|
| DNA Replication Pre-Initiation (R-HSA-69002)                                  | 82 | 19 | 8.38 | 2.27 | 0.0011 | 0.022 |
| UCH proteinases (R-HSA-5689603)                                               | 89 | 20 | 9.1  | 2.2  | 0.0012 | 0.023 |
| Antigen processing-Cross presentation (R-HSA-1236975)                         | 89 | 20 | 9.1  | 2.2  | 0.0012 | 0.023 |
| SCF(Skp2)-mediated degradation of p27/p21 (R-HSA-187577)                      | 58 | 15 | 5.93 | 2.53 | 0.0012 | 0.023 |
| Dectin-1 mediated noncanonical NF-kB signaling (R-HSA-5607761)                | 58 | 15 | 5.93 | 2.53 | 0.0012 | 0.024 |
| mRNA Splicing - Minor Pathway (R-HSA-72165)                                   | 52 | 14 | 5.32 | 2.63 | 0.0012 | 0.024 |
| Defective CFTR causes cystic fibrosis (R-HSA-5678895)                         | 58 | 15 | 5.93 | 2.53 | 0.0012 | 0.024 |
| Regulation of APC/C activators between G1/S and early anaphase (R-HSA-176408) | 77 | 18 | 7.87 | 2.29 | 0.0013 | 0.025 |
| tRNA modification in the                                                      | 41 | 12 | 4.19 | 2.86 | 0.0013 | 0.025 |

|                                                                                            |     |    |       |      |        |       |
|--------------------------------------------------------------------------------------------|-----|----|-------|------|--------|-------|
| nucleus and cytosol (R-HSA-6782315)                                                        |     |    |       |      |        |       |
| Asymmetric localization of PCP proteins (R-HSA-4608870)                                    | 60  | 15 | 6.14  | 2.44 | 0.0017 | 0.031 |
| RAF/MAP kinase cascade (R-HSA-5673001)                                                     | 162 | 30 | 16.57 | 1.81 | 0.0018 | 0.032 |
| RUNX1 regulates transcription of genes involved in differentiation of HSCs (R-HSA-8939236) | 80  | 18 | 8.18  | 2.2  | 0.0019 | 0.035 |
| KSRP (KHSRP) binds and destabilizes mRNA (R-HSA-450604)                                    | 17  | 7  | 1.74  | 4.03 | 0.0021 | 0.038 |
| p53-Dependent G1 DNA Damage Response (R-HSA-69563)                                         | 62  | 15 | 6.34  | 2.37 | 0.0023 | 0.040 |
| p53-Dependent G1/S DNA damage checkpoint (R-HSA-69580)                                     | 62  | 15 | 6.34  | 2.37 | 0.0023 | 0.041 |
| Signaling by NOTCH4 (R-HSA-9013694)                                                        | 75  | 17 | 7.67  | 2.22 | 0.0024 | 0.041 |
| MAPK1/MAPK3 signaling                                                                      | 167 | 30 | 17.08 | 1.76 | 0.0027 | 0.047 |

|                                                                  |    |    |      |      |        |       |
|------------------------------------------------------------------|----|----|------|------|--------|-------|
| (R-HSA-5684996)                                                  |    |    |      |      |        |       |
| Regulation of mitotic cell cycle (R-HSA-453276)                  | 83 | 18 | 8.49 | 2.12 | 0.0029 | 0.048 |
| APC/C-mediated degradation of cell cycle proteins (R-HSA-174143) | 83 | 18 | 8.49 | 2.12 | 0.0029 | 0.049 |
| PCP/CE pathway (R-HSA-4086400)                                   | 83 | 18 | 8.49 | 2.12 | 0.0029 | 0.049 |

**Table S1:** Pathway over-representation analysis of downregulated transcripts in the whole-cell transcriptome using PANTHER gene expression analysis. “Reactome Pathway” was set as the level of biological granularity. Genes were included in the “downregulated fraction” on the basis of possessing a mean log fold change  $< 0$  in the ME/CFS group versus the control mean, and a Q value  $< 0.05$  according to the Benjamini-Hochberg method applied to P values from the F test. The PANTHER analysis was then applied to the list, testing for over-representation of particular pathways in the list using the binomial test, followed by calculation of the False Discovery Rate (FDR, using the Benjamini-Hochberg method). Output was sorted by statistical significance.



**Table S2. Pathways overrepresented amongst upregulated transcripts in ME/CFS lymphoblasts.**

| Reactome pathway                                                    | Number of genes      |                                  |          | Fold enrichment | Binomial test P-value |
|---------------------------------------------------------------------|----------------------|----------------------------------|----------|-----------------|-----------------------|
|                                                                     | In entire experiment | In upregulated fraction (Q<0.05) | Expected |                 |                       |
| RNA Polymerase II Transcription (R-HSA-73857)                       | 1116                 | 105                              | 74.65    | 1.41            | $2.74 \times 10^{-4}$ |
| Gene expression (Transcription) (R-HSA-74160)                       | 1234                 | 113                              | 82.55    | 1.37            | $4.30 \times 10^{-4}$ |
| Generic Transcription Pathway (R-HSA-212436)                        | 997                  | 93                               | 66.69    | 1.39            | $8.18 \times 10^{-4}$ |
| ZBP1(DAI) mediated induction of type I IFNs (R-HSA-1606322)         | 20                   | 6                                | 1.34     | 4.48            | 0.0025                |
| Cytosolic sensors of pathogen-associated DNA (R-HSA-1834949)        | 61                   | 11                               | 4.08     | 2.7             | 0.0032                |
| RIP-mediated NFkB activation via ZBP1 (R-HSA-1810476)               | 16                   | 5                                | 1.07     | 4.67            | 0.0048                |
| Signaling by MET (R-HSA-6806834)                                    | 56                   | 10                               | 3.75     | 2.67            | 0.0052                |
| Cargo recognition for clathrin-mediated endocytosis (R-HSA-8856825) | 70                   | 11                               | 4.68     | 2.35            | 0.0086                |
| Transport of vitamins, nucleosides, and related                     | 27                   | 6                                | 1.81     | 3.32            | 0.010                 |

|                                                                                                                                   |     |    |       |      |       |
|-----------------------------------------------------------------------------------------------------------------------------------|-----|----|-------|------|-------|
| molecules (R-HSA-425397)                                                                                                          |     |    |       |      |       |
| HATs acetylate histones (R-HSA-3214847)                                                                                           | 93  | 13 | 6.22  | 2.09 | 0.011 |
| Antiviral mechanism by IFN-stimulated genes (R-HSA-1169410)                                                                       | 75  | 11 | 5.02  | 2.19 | 0.014 |
| Netrin-1 signaling (R-HSA-373752)                                                                                                 | 29  | 6  | 1.94  | 3.09 | 0.014 |
| Interferon Signaling (R-HSA-913531)                                                                                               | 162 | 19 | 10.84 | 1.75 | 0.015 |
| p75NTR signals via NF-kB (R-HSA-193639)                                                                                           | 14  | 4  | 0.94  | 4.27 | 0.015 |
| Netrin mediated repulsion signals (R-HSA-418886)                                                                                  | 3   | 2  | 0.2   | 9.97 | 0.018 |
| Metabolism of ingested H <sub>2</sub> SeO <sub>4</sub> and H <sub>2</sub> SeO <sub>3</sub> into H <sub>2</sub> Se (R-HSA-2408550) | 3   | 2  | 0.2   | 9.97 | 0.018 |
| Transport of nucleotide sugars (R-HSA-727802)                                                                                     | 9   | 3  | 0.6   | 4.98 | 0.023 |
| OAS antiviral response (R-HSA-8983711)                                                                                            | 9   | 3  | 0.6   | 4.98 | 0.023 |
| STING mediated induction of host immune responses (R-HSA-1834941)                                                                 | 16  | 4  | 1.07  | 3.74 | 0.024 |
| Signaling by Hippo (R-                                                                                                            | 16  | 4  | 1.07  | 3.74 | 0.024 |

|                                                                                                    |     |    |      |      |       |
|----------------------------------------------------------------------------------------------------|-----|----|------|------|-------|
| HSA-2028269)                                                                                       |     |    |      |      |       |
| Regulation of cholesterol biosynthesis by SREBP (SREBF) (R-HSA-1655829)                            | 52  | 8  | 3.48 | 2.3  | 0.026 |
| Downstream signal transduction (R-HSA-186763)                                                      | 25  | 5  | 1.67 | 2.99 | 0.028 |
| PPARA activates gene expression (R-HSA-1989781)                                                    | 95  | 12 | 6.35 | 1.89 | 0.029 |
| Clathrin-mediated endocytosis (R-HSA-8856828)                                                      | 106 | 13 | 7.09 | 1.83 | 0.029 |
| NR1H2 & NR1H3 regulate gene expression linked to triglyceride lipolysis in adipose (R-HSA-9031528) | 4   | 2  | 0.27 | 7.47 | 0.030 |
| Transport of organic anions (R-HSA-879518)                                                         | 4   | 2  | 0.27 | 7.47 | 0.030 |
| RHO GTPases activate KTN1 (R-HSA-5625970)                                                          | 10  | 3  | 0.67 | 4.48 | 0.030 |
| Regulation of lipid metabolism by PPARalpha (R-HSA-400206)                                         | 96  | 12 | 6.42 | 1.87 | 0.031 |
| Toll Like Receptor 9 (TLR9) Cascade (R-HSA-168138)                                                 | 86  | 11 | 5.75 | 1.91 | 0.033 |

|                                                                                                 |     |    |       |      |       |
|-------------------------------------------------------------------------------------------------|-----|----|-------|------|-------|
| CREB1 phosphorylation through NMDA receptor-mediated activation of RAS signaling (R-HSA-442742) | 18  | 4  | 1.2   | 3.32 | 0.034 |
| Nuclear Receptor transcription pathway (R-HSA-383280)                                           | 27  | 5  | 1.81  | 2.77 | 0.037 |
| Transport of small molecules (R-HSA-382551)                                                     | 443 | 40 | 29.63 | 1.35 | 0.037 |
| N-Glycan antennae elongation (R-HSA-975577)                                                     | 11  | 3  | 0.74  | 4.08 | 0.039 |
| p75NTR recruits signalling complexes (R-HSA-209543)                                             | 11  | 3  | 0.74  | 4.08 | 0.039 |
| PECAM1 interactions (R-HSA-210990)                                                              | 11  | 3  | 0.74  | 4.08 | 0.039 |
| TRIF(TICAM1)-mediated TLR4 signaling (R-HSA-937061)                                             | 89  | 11 | 5.95  | 1.85 | 0.040 |
| MyD88-independent TLR4 cascade (R-HSA-166166)                                                   | 89  | 11 | 5.95  | 1.85 | 0.040 |
| Retrograde transport at the Trans-Golgi-Network (R-HSA-6811440)                                 | 47  | 7  | 3.14  | 2.23 | 0.041 |
| Membrane Trafficking (R-HSA-199991)                                                             | 526 | 46 | 35.19 | 1.31 | 0.042 |
| Transport to the Golgi and                                                                      | 159 | 17 | 10.64 | 1.6  | 0.043 |

|                                                                                    |     |    |       |      |       |
|------------------------------------------------------------------------------------|-----|----|-------|------|-------|
| subsequent modification (R-HSA-948021)                                             |     |    |       |      |       |
| Vesicle-mediated transport (R-HSA-5653656)                                         | 540 | 47 | 36.12 | 1.3  | 0.043 |
| NR1H2 & NR1H3 regulate gene expression to limit cholesterol uptake (R-HSA-9031525) | 5   | 2  | 0.33  | 5.98 | 0.045 |
| Signaling by Receptor Tyrosine Kinases (R-HSA-9006934)                             | 334 | 31 | 22.34 | 1.39 | 0.045 |
| Signaling by NTRKs (R-HSA-166520)                                                  | 80  | 10 | 5.35  | 1.87 | 0.046 |
| Diseases of Immune System (R-HSA-5260271)                                          | 20  | 4  | 1.34  | 2.99 | 0.047 |
| Diseases associated with the TLR signaling cascade (R-HSA-5602358)                 | 20  | 4  | 1.34  | 2.99 | 0.047 |
| SLC transporter disorders (R-HSA-5619102)                                          | 59  | 8  | 3.95  | 2.03 | 0.048 |
| Gastrin-CREB signalling pathway via PKC and MAPK (R-HSA-881907)                    | 12  | 3  | 0.8   | 3.74 | 0.048 |
| Ion channel transport (R-HSA-983712)                                               | 103 | 12 | 6.89  | 1.74 | 0.048 |

|                                                                                             |    |    |      |      |       |
|---------------------------------------------------------------------------------------------|----|----|------|------|-------|
| TRAF6 mediated induction of NFkB and MAP kinases upon TLR7/8 or 9 activation (R-HSA-975138) | 81 | 10 | 5.42 | 1.85 | 0.049 |
| Activation of gene expression by SREBF (SREBP) (R-HSA-2426168)                              | 39 | 6  | 2.61 | 2.3  | 0.049 |

**Table S2:** Pathway over-representation analysis of upregulated transcripts in whole-cell transcriptome data using PANTHER gene expression analysis. “Reactome Pathway” was set as the level of biological granularity. Genes were included in the “upregulated fraction” on the basis of possessing a mean log fold change > 0 in the ME/CFS group versus the control mean, and a Q value < 0.05 according to the Benjamini-Hochberg method applied to P values from the F test. Output was sorted according to statistical significance. The PANTHER analysis was then applied to the list testing for over-representation of particular pathways in the list using the binomial test. The FDR correction was not applied to the PANTHER analysis. Output was sorted by statistical significance.

**Table S3: Transcript levels of CD cell markers and Sirtuins detected in whole cell transcriptomes of ME/CFS and control lymphoblasts.**

| <b>Gene Name</b> | <b>LogFC</b> | <b>P-value</b> | <b>Q-value</b> |
|------------------|--------------|----------------|----------------|
| CD151            | -0.13        | 0.51           | 1.71           |
| CD164            | 0.28         | 0.028          | 0.032          |
| CD180            | -0.007       | 0.98           | 95.21          |
| CD19             | -0.42        | 0.0007         | 0.00074        |
| CD200            | -0.085       | 0.80           | 6.79           |
| CD22             | 0.051        | 0.80           | 6.72           |
| CD226            | 0.24         | 0.38           | 0.94           |
| CD24             | 0.38         | 0.31           | 0.68           |
| CD27             | -0.33        | 0.22           | 0.40           |
| CD274            | 0.16         | 0.51           | 1.70           |
| CD2AP            | 0.11         | 0.24           | 0.45           |
| CD300A           | 0.31         | 0.13           | 0.19           |
| CD320            | -0.37        | 0.052          | 0.065          |
| CD37             | -0.12        | 0.33           | 0.73           |
| CD38             | -0.15        | 0.55           | 1.96           |
| CD40             | 0.079        | 0.52           | 1.79           |
| CD44             | -0.053       | 0.75           | 5.08           |
| CD46             | 0.19         | 0.21           | 0.38           |
| CD47             | -0.33        | 0.031          | 0.035          |
| CD48             | 0.10         | 0.56           | 2.13           |
| CD52             | -0.39        | 0.030          | 0.035          |
| CD53             | 0.24         | 0.057          | 0.072          |
| CD55             | 0.30         | 0.17           | 0.27           |
| CD58             | 0.026        | 0.85           | 9.64           |
| CD59             | -0.13        | 0.27           | 0.54           |
| CD63             | -0.33        | 0.056          | 0.070          |
| CD69             | 0.20         | 0.32           | 0.71           |
| CD70             | -0.00068     | 1.00           | 341.15         |
| CD72             | 0.020        | 0.94           | 25.35          |
| CD74             | 0.069        | 0.67           | 3.41           |
| CD79A            | -0.34        | 0.040          | 0.048          |
| CD79B            | -0.25        | 0.16           | 0.26           |

|        |        |        |        |
|--------|--------|--------|--------|
| CD80   | 0.047  | 0.82   | 7.79   |
| CD81   | -0.15  | 0.22   | 0.39   |
| CD82   | 0.17   | 0.29   | 0.61   |
| CD83   | 0.23   | 0.22   | 0.40   |
| CD84   | 0.053  | 0.82   | 7.99   |
| CD86   | -0.15  | 0.41   | 1.07   |
| CD99   | 0.045  | 0.79   | 6.66   |
| CD99L2 | -0.23  | 0.14   | 0.21   |
| SIRT1  | 0.29   | 0.091  | 0.13   |
| SIRT2  | 0.23   | 0.0058 | 0.0060 |
| SIRT3  | -0.22  | 0.011  | 0.012  |
| SIRT4  | 0.042  | 0.86   | 10.50  |
| SIRT5  | -0.11  | 0.18   | 0.31   |
| SIRT6  | -0.30  | 0.012  | 0.013  |
| SIRT7  | -0.080 | 0.31   | 0.68   |

**Table S3:** Transcript levels of CD cell markers and Sirtuins detected in whole cell transcriptomics of ME/CFS and control lymphoblasts. LogFC represents the log fold change in the ME/CFS group relative to the control group. Q values were assigned according to the Benjamini-Hochberg method.



**Table S4. Pathways over-represented amongst upregulated proteins in ME/CFS lymphoblasts.**

| Reactome pathway                                                               | Number of proteins |                                                |          | Fold enrichment | Binomial test P value |
|--------------------------------------------------------------------------------|--------------------|------------------------------------------------|----------|-----------------|-----------------------|
|                                                                                | In entire dataset  | In significantly upregulated fraction (Q<0.05) | Expected |                 |                       |
| Metabolism (R-HSA-1430728)                                                     | 789                | 66                                             | 43.61    | 1.51            | $2.12 \times 10^{-4}$ |
| Mitochondrial Fatty Acid Beta-Oxidation (R-HSA-77289)                          | 23                 | 7                                              | 1.27     | 5.51            | $3.32 \times 10^{-4}$ |
| Interferon gamma signaling (R-HSA-877300)                                      | 49                 | 10                                             | 2.71     | 3.69            | $4.60 \times 10^{-4}$ |
| Beta oxidation of palmitoyl-CoA to myristoyl-CoA (R-HSA-77305)                 | 3                  | 3                                              | 0.17     | 18.09           | $6.64 \times 10^{-4}$ |
| Mitochondrial fatty acid beta-oxidation of saturated fatty acids (R-HSA-77286) | 7                  | 4                                              | 0.39     | 10.34           | $6.72 \times 10^{-4}$ |
| Phosphorylation of CD3 and TCR zeta chains (R-HSA-202427)                      | 13                 | 5                                              | 0.72     | 6.96            | $8.53 \times 10^{-4}$ |
| Mitochondrial calcium ion transport (R-HSA-8949215)                            | 13                 | 5                                              | 0.72     | 6.96            | $8.53 \times 10^{-4}$ |
| Beta oxidation of lauroyl-CoA to decanoyl-CoA-CoA (R-HSA-77310)                | 4                  | 3                                              | 0.22     | 13.57           | 0.0015                |
| Glutamate Neurotransmitter Release Cycle (R-HSA-210500)                        | 4                  | 3                                              | 0.22     | 13.57           | 0.0015                |
| Interleukin-2 family signaling (R-HSA-451927)                                  | 15                 | 5                                              | 0.83     | 6.03            | 0.0016                |
| PD-1 signaling (R-HSA-389948)                                                  | 15                 | 5                                              | 0.83     | 6.03            | 0.0016                |
| Cytokine Signaling in Immune system (R-HSA-1280215)                            | 327                | 31                                             | 18.08    | 1.72            | 0.0023                |
| Interleukin-9 signaling (R-HSA-8985947)                                        | 5                  | 3                                              | 0.28     | 10.85           | 0.0028                |

|                                                                                  |    |    |      |       |        |
|----------------------------------------------------------------------------------|----|----|------|-------|--------|
| Beta oxidation of hexanoyl-CoA to butanoyl-CoA (R-HSA-77350)                     | 5  | 3  | 0.28 | 10.85 | 0.0028 |
| Beta oxidation of octanoyl-CoA to hexanoyl-CoA (R-HSA-77348)                     | 5  | 3  | 0.28 | 10.85 | 0.0028 |
| Beta oxidation of decanoyl-CoA to octanoyl-CoA (R-HSA-77346)                     | 5  | 3  | 0.28 | 10.85 | 0.0028 |
| Interleukin-21 signaling (R-HSA-9020958)                                         | 5  | 3  | 0.28 | 10.85 | 0.0028 |
| Mitochondrial fatty acid beta-oxidation of unsaturated fatty acids (R-HSA-77288) | 5  | 3  | 0.28 | 10.85 | 0.0028 |
| Fatty acid metabolism (R-HSA-8978868)                                            | 63 | 10 | 3.48 | 2.87  | 0.0029 |
| Translocation of ZAP-70 to Immunological synapse (R-HSA-202430)                  | 11 | 4  | 0.61 | 6.58  | 0.0035 |
| Generation of second messenger molecules (R-HSA-202433)                          | 18 | 5  | 0.99 | 5.03  | 0.0035 |
| Cell-Cell communication (R-HSA-1500931)                                          | 27 | 6  | 1.49 | 4.02  | 0.0042 |
| Interleukin-2 signaling (R-HSA-9020558)                                          | 6  | 3  | 0.33 | 9.05  | 0.0047 |
| Acyl chain remodeling of CL (R-HSA-1482798)                                      | 2  | 2  | 0.11 | 18.09 | 0.0057 |
| Adenylate cyclase inhibitory pathway (R-HSA-170670)                              | 2  | 2  | 0.11 | 18.09 | 0.0057 |
| Beta oxidation of myristoyl-CoA to lauroyl-CoA (R-HSA-77285)                     | 2  | 2  | 0.11 | 18.09 | 0.0057 |
| Signaling by PDGF (R-HSA-186797)                                                 | 13 | 4  | 0.72 | 5.57  | 0.0062 |
| Downstream signal transduction (R-HSA-186763)                                    | 13 | 4  | 0.72 | 5.57  | 0.0062 |

|                                                                   |     |    |       |       |        |
|-------------------------------------------------------------------|-----|----|-------|-------|--------|
| Nephrin family interactions (R-HSA-373753)                        | 7   | 3  | 0.39  | 7.75  | 0.0072 |
| Signaling by cytosolic FGFR1 fusion mutants (R-HSA-1839117)       | 8   | 3  | 0.44  | 6.78  | 0.010  |
| Processing of SMDT1 (R-HSA-8949664)                               | 8   | 3  | 0.44  | 6.78  | 0.010  |
| Interleukin-20 family signaling (R-HSA-8854691)                   | 8   | 3  | 0.44  | 6.78  | 0.010  |
| Erythropoietin activates STAT5 (R-HSA-9027283)                    | 3   | 2  | 0.17  | 12.06 | 0.012  |
| Release of apoptotic factors from the mitochondria (R-HSA-111457) | 3   | 2  | 0.17  | 12.06 | 0.012  |
| STAT5 Activation (R-HSA-9645135)                                  | 3   | 2  | 0.17  | 12.06 | 0.012  |
| Mitochondrial biogenesis (R-HSA-1592230)                          | 45  | 7  | 2.49  | 2.81  | 0.013  |
| Organelle biogenesis and maintenance (R-HSA-1852241)              | 104 | 12 | 5.75  | 2.09  | 0.014  |
| FGFR1 mutant receptor activation (R-HSA-1839124)                  | 9   | 3  | 0.5   | 6.03  | 0.014  |
| Neurotransmitter release cycle (R-HSA-112310)                     | 9   | 3  | 0.5   | 6.03  | 0.014  |
| Growth hormone receptor signaling (R-HSA-982772)                  | 9   | 3  | 0.5   | 6.03  | 0.014  |
| TCR signaling (R-HSA-202403)                                      | 80  | 10 | 4.42  | 2.26  | 0.014  |
| Immune System (R-HSA-168256)                                      | 805 | 58 | 44.5  | 1.3   | 0.017  |
| Transmission across Chemical Synapses (R-HSA-112315)              | 60  | 8  | 3.32  | 2.41  | 0.019  |
| Metabolism of amino acids and derivatives (R-HSA-71291)           | 220 | 20 | 12.16 | 1.64  | 0.021  |
| Signaling by Leptin (R-HSA-2586552)                               | 4   | 2  | 0.22  | 9.05  | 0.021  |
| Gluconeogenesis (R-HSA-70263)                                     | 19  | 4  | 1.05  | 3.81  | 0.022  |

|                                                                                |     |    |      |      |       |
|--------------------------------------------------------------------------------|-----|----|------|------|-------|
| Signaling by FGFR1 in disease (R-HSA-5655302)                                  | 11  | 3  | 0.61 | 4.93 | 0.024 |
| EPH-Ephrin signaling (R-HSA-2682334)                                           | 40  | 6  | 2.21 | 2.71 | 0.025 |
| The citric acid (TCA) cycle and respiratory electron transport (R-HSA-1428517) | 115 | 12 | 6.36 | 1.89 | 0.027 |
| Formation of ATP by chemiosmotic coupling (R-HSA-163210)                       | 12  | 3  | 0.66 | 4.52 | 0.030 |
| Pentose phosphate pathway (R-HSA-71336)                                        | 12  | 3  | 0.66 | 4.52 | 0.030 |
| RAB geranylgeranylation (R-HSA-8873719)                                        | 31  | 5  | 1.71 | 2.92 | 0.030 |
| Transcriptional activation of mitochondrial biogenesis (R-HSA-2151201)         | 21  | 4  | 1.16 | 3.45 | 0.030 |
| Activation of GABAB receptors (R-HSA-991365)                                   | 5   | 2  | 0.28 | 7.24 | 0.032 |
| VxPx cargo-targeting to cilium (R-HSA-5620916)                                 | 5   | 2  | 0.28 | 7.24 | 0.032 |
| Interleukin-15 signaling (R-HSA-8983432)                                       | 5   | 2  | 0.28 | 7.24 | 0.032 |
| ADP signalling through P2Y purinoceptor 12 (R-HSA-392170)                      | 5   | 2  | 0.28 | 7.24 | 0.032 |
| Sulfide oxidation to sulfate (R-HSA-1614517)                                   | 5   | 2  | 0.28 | 7.24 | 0.032 |
| G-protein activation (R-HSA-202040)                                            | 5   | 2  | 0.28 | 7.24 | 0.032 |
| Interaction between L1 and Ankyrins (R-HSA-445095)                             | 5   | 2  | 0.28 | 7.24 | 0.032 |
| Aspartate and asparagine metabolism (R-HSA-8963693)                            | 5   | 2  | 0.28 | 7.24 | 0.032 |
| Phenylalanine and tyrosine metabolism (R-HSA-8963691)                          | 5   | 2  | 0.28 | 7.24 | 0.032 |

|                                                               |     |    |      |      |       |
|---------------------------------------------------------------|-----|----|------|------|-------|
| GABA B receptor activation (R-HSA-977444)                     | 5   | 2  | 0.28 | 7.24 | 0.032 |
| GABA receptor activation (R-HSA-977443)                       | 5   | 2  | 0.28 | 7.24 | 0.032 |
| Interferon Signaling (R-HSA-913531)                           | 121 | 12 | 6.69 | 1.79 | 0.038 |
| Detoxification of Reactive Oxygen Species (R-HSA-3299685)     | 23  | 4  | 1.27 | 3.15 | 0.040 |
| Costimulation by the CD28 family (R-HSA-388841)               | 34  | 5  | 1.88 | 2.66 | 0.042 |
| FLT3 Signaling (R-HSA-9607240)                                | 96  | 10 | 5.31 | 1.88 | 0.042 |
| Cargo trafficking to the periciliary membrane (R-HSA-5620920) | 14  | 3  | 0.77 | 3.88 | 0.043 |
| Signaling by SCF-KIT (R-HSA-1433557)                          | 14  | 3  | 0.77 | 3.88 | 0.043 |
| Prolactin receptor signaling (R-HSA-1170546)                  | 6   | 2  | 0.33 | 6.03 | 0.044 |
| Nef Mediated CD8 Down-regulation (R-HSA-182218)               | 6   | 2  | 0.33 | 6.03 | 0.044 |
| Lysine catabolism (R-HSA-71064)                               | 6   | 2  | 0.33 | 6.03 | 0.044 |
| Clathrin-mediated endocytosis (R-HSA-8856828)                 | 71  | 8  | 3.92 | 2.04 | 0.045 |
| Downstream TCR signaling (R-HSA-202424)                       | 71  | 8  | 3.92 | 2.04 | 0.045 |
| Neuronal System (R-HSA-112316)                                | 71  | 8  | 3.92 | 2.04 | 0.045 |
| Diseases of metabolism (R-HSA-5668914)                        | 24  | 4  | 1.33 | 3.02 | 0.045 |

**Table S4:** Pathway over-representation analysis of upregulated whole-cell proteome data using PANTHER gene expression analysis. “Reactome Pathway” was set as the level of biological granularity. Proteins were included in the “upregulated fraction” on the basis of possessing a mean fold change > 1 in the ME/CFS group versus the control mean, and a Q value < 0.05 according to the Benjamini-Hochberg method applied to P-values from the t test. The PANTHER analysis was then applied to the list testing for over-representation of particular pathways in the list using the binomial test. The FDR correction was not applied to the PANTHER analysis as it obscured true positives confirmed by alternative investigation of concerned functional groups, including respirometry, western blotting and closer proteome analysis. Output was sorted by statistical significance.

**Table S5. Pathways over-represented amongst downregulated proteins in ME/CFS lymphoblasts.**

| Reactome pathway                                                            | Number of proteins |                                                  |          | Fold enrichment | Binomial test P-value |
|-----------------------------------------------------------------------------|--------------------|--------------------------------------------------|----------|-----------------|-----------------------|
|                                                                             | In entire dataset  | In significantly downregulated fraction (Q<0.05) | Expected |                 |                       |
| Vitamin B1 (thiamin) metabolism (R-HSA-196819)                              | 1                  | 1                                                | 0.01     | > 100           | 0.0097                |
| Defective PMM2 causes PMM2-CDG (CDG-1a) (R-HSA-4043911)                     | 1                  | 1                                                | 0.01     | > 100           | 0.0097                |
| Regulation of gene expression by Hypoxia-inducible Factor (R-HSA-1234158)   | 2                  | 1                                                | 0.02     | 51.26           | 0.019                 |
| Protein repair (R-HSA-5676934)                                              | 2                  | 1                                                | 0.02     | 51.26           | 0.019                 |
| RHO GTPases activate PKNs (R-HSA-5625740)                                   | 27                 | 2                                                | 0.26     | 7.59            | 0.029                 |
| NOTCH4 Activation and Transmission of Signal to the Nucleus (R-HSA-9013700) | 3                  | 1                                                | 0.03     | 34.17           | 0.029                 |
| ALKBH3 mediated reversal of alkylation damage (R-HSA-112126)                | 3                  | 1                                                | 0.03     | 34.17           | 0.029                 |
| GP1b-IX-V activation signalling (R-HSA-430116)                              | 3                  | 1                                                | 0.03     | 34.17           | 0.029                 |
| Meiosis (R-HSA-1500620)                                                     | 29                 | 2                                                | 0.28     | 7.07            | 0.033                 |
| Synthesis of GDP-mannose (R-HSA-446205)                                     | 4                  | 1                                                | 0.04     | 25.63           | 0.038                 |
| Reproduction (R-HSA-1474165)                                                | 32                 | 2                                                | 0.31     | 6.41            | 0.039                 |
| Reversal of alkylation damage by DNA dioxygenases (R-HSA-73943)             | 5                  | 1                                                | 0.05     | 20.5            | 0.048                 |

**Table S5:** Pathway over-representation analysis of downregulated whole-cell proteome data using PANTHER gene expression analysis. “Reactome Pathway” was set as the level of biological granularity. Proteins were included in the “downregulated fraction” on the basis of possessing a mean fold change  $< 1$  in the ME/CFS group versus the control mean, and a Q value  $< 0.05$  according to the Benjamini-Hochberg method applied to P-values from the t test. The PANTHER analysis was then applied to the list, testing for over-representation of particular pathways in the list using binomial test. The FDR correction was not applied to the PANTHER analysis as it obscured true positives confirmed by alternative investigation of concerned functional groups, including respirometry, western blotting and closer proteome analysis. Output was sorted by statistical significance.

**Table S6: Protein levels of CD cell markers detected in whole cell proteomes of ME/CFS and control lymphoblasts.**

| Protein Name | Fold change | P-value | Q-value |
|--------------|-------------|---------|---------|
| CD226        | 4.06        | 0.038   | 0.041   |
| CD2AP        | 0.95        | 0.67    | 2.48    |
| CD37         | 1.62        | 0.12    | 0.15    |
| CD38         | 1.42        | 0.11    | 0.13    |
| CD40         | 1.22        | 0.31    | 0.52    |
| CD44         | 1.18        | 0.17    | 0.23    |
| CD48         | 1.30        | 0.016   | 0.016   |
| CD59         | 1.04        | 0.82    | 5.66    |
| CD70         | 1.83        | 0.0010  | 0.0010  |
| CD74         | 1.12        | 0.29    | 0.45    |
| CD79A        | 0.56        | 0.39    | 0.75    |
| CD81         | 1.11        | 0.68    | 2.62    |
| CD97         | 1.20        | 0.39    | 0.74    |

**Table S6:** Protein levels of CD cell markers and Sirtuins detected in whole cell proteomics of ME/CFS and control lymphoblasts. Fold change represents the mean fold change in the ME/CFS group relative to the control group. Q values were assigned according to the Benjamini-Hochberg method.



**Figure S1: Verification of proteomics and transcriptomics data.**

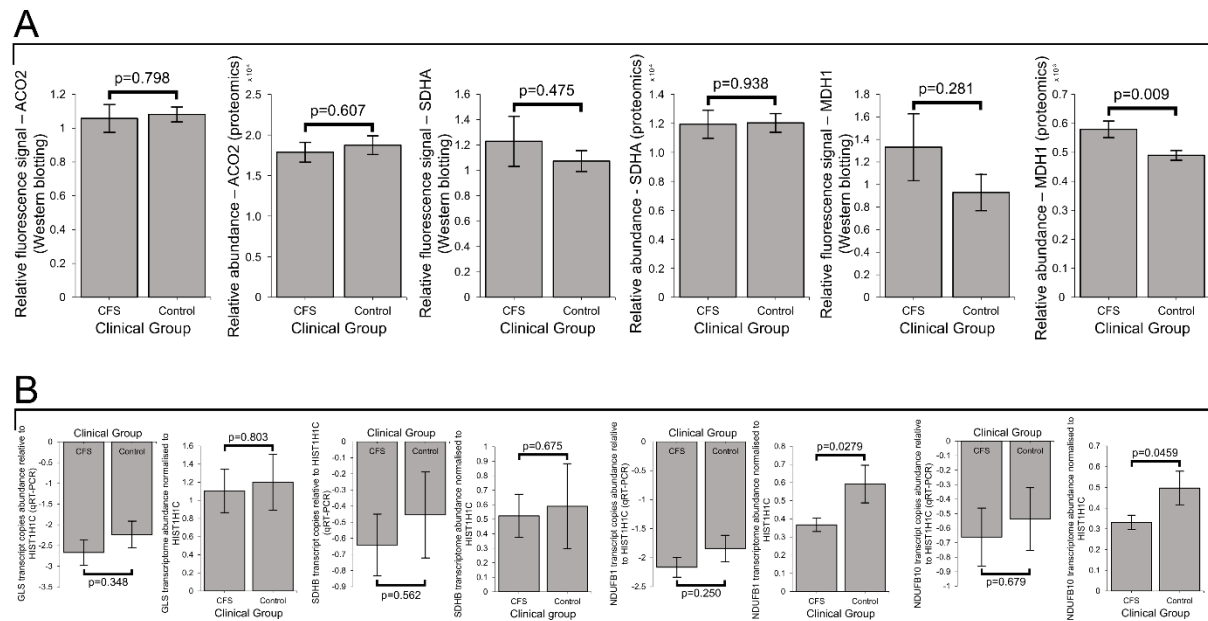

**Figure S1:** Western blots and qRT-PCR results verifying whole-cell proteome and transcriptome observations, respectively. **(A)** ACO2, SDHA and MDH1 expression as measured by semiquantitative Western blotting are consistent with expression as measured by whole-cell proteomics. In each pair of charts, the left panel is the result of semiquantitative western blotting and the right panel is the relative abundance of the same protein in the proteomics. Western blot sample sizes are as follows. ACO2: ME/CFS n = 21, Control = 22. SdhA: ME/CFS n = 17, Control = 19. MDH1: ME/CFS n = 6, Control = 7. Whole-cell proteomics experiment: ME/CFS n = 34, Control = 31. **(B)** GLS, SdhB, NDUFB1 and NDUFB10 transcript levels relative to HIST1H1C were consistent in direction between qRT-PCR experiments and the whole-cell transcriptomes. In each pair of charts, the left panel is the result of semiquantitative qRT-PCR and the right panel is the relative abundance of the same transcript in the transcriptomics. GLS qRT-PCR: ME/CFS n = 23, Control = 16. SdhB qRT-PCR: ME/CFS n = 23, Control = 16. NDUFB1 and NDUFB10 GLS qRT-PCR: ME/CFS n = 22, Control = 16. Whole-cell transcriptomics experiment: ME/CFS n = 23, Control = 17.

**Figure S2. Example semi-quantitative Western blot and loading control images as part of confirmatory experiments verifying the whole-cell proteomics data**

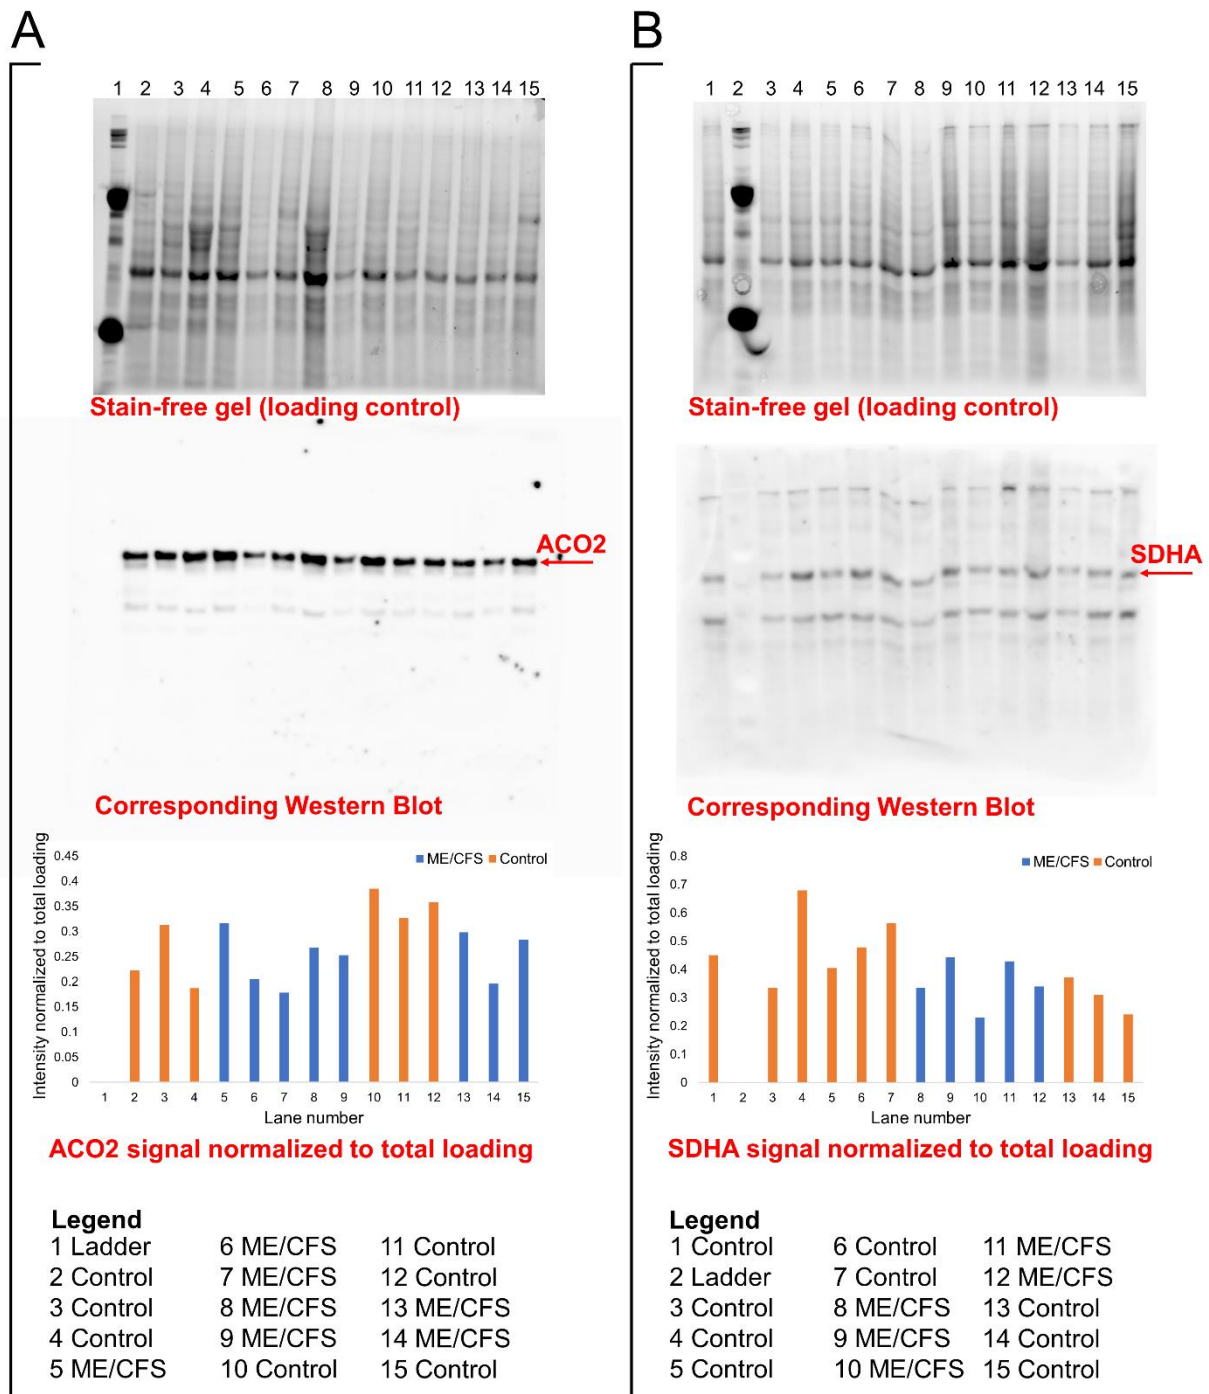

**Figure S2:** Example images of confirmatory semi-quantitative Western blots and loading controls (stain-free gels). **(A)** Example Western blot undertaken as part of the experiments verifying ACO2 levels in the whole-cell proteomes. The intensity of individual bands was digitally quantified and normalized to internal control cell lines included in every experiment. Protein ladder was visible in the stain-free gel but not in this particular corresponding blot. The chart below the blot shows the signal of the band of interest normalized to total protein loading. **(B)** Example Western blot undertaken as part of the experiments verifying SDHA levels in the whole-cell proteomes. The intensity of individual bands was digitally quantified and

normalized to internal control cell lines included in every experiment. The chart below the blot shows the signal of the band of interest normalized to total protein loading.

**Figure S3. SLC25A11 and MDH1 expression are elevated, while that of BCKDK is unaltered in ME/CFS lymphoblasts.**

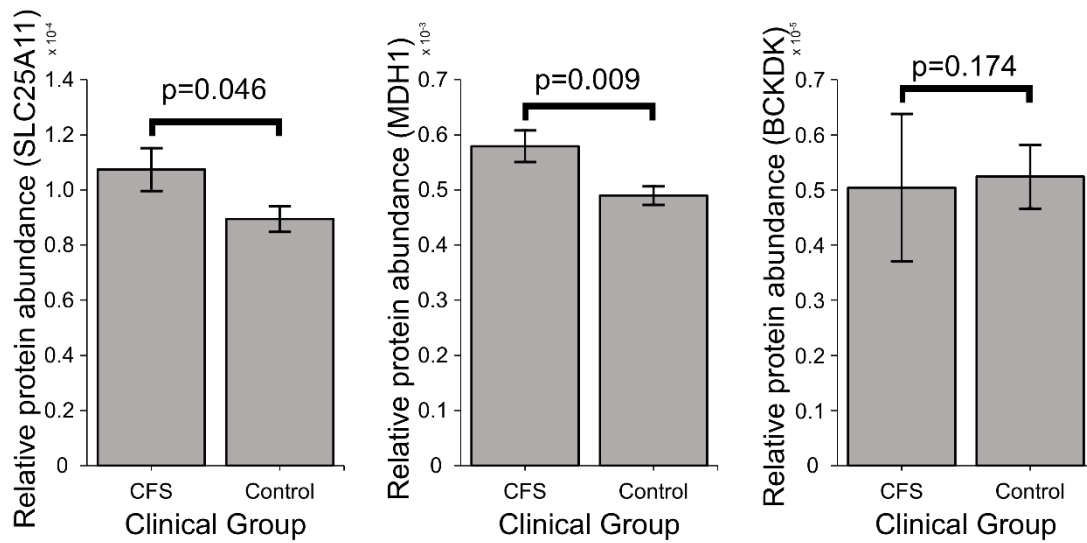

**Figure S3:** Expression of SLC25A11 and MDH1 is elevated in the whole-cell proteomes of ME/CFS lymphoblasts, while that of BCKDK is unaltered (two-tailed *t* tests in each case). Error bars represent standard error of the mean. Relative protein abundance was obtained from iBAQ values normalised to the control average within the respective individual experiments.
